# Supplementary material
Source: Springer Nature journal article supplement (https://www.springermedizin.de/resource/supplementary/12936_2007_454_MOESM2_ESM.pdf/9547486)

Mean test band intensity  
On RDT rating chart

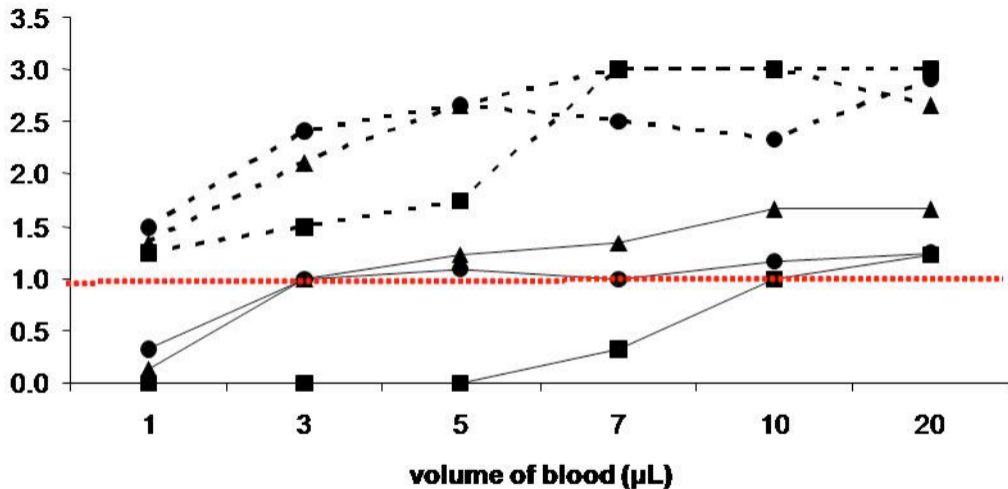

—▲— Paracheck-200    —●— ICT-200    —■— Optimal-200  
- -▲- - Paracheck-2000    - -●- - ICT-2000    - -■- - Optimal-2000

Supplement: MOESM2 [file 9547486]
